# Supplementary material
Source: PubMed Central journal article supplement (PMC4905583)
Supplement: NIHMS787781-supplement-Suppl_Tables.pdf [file NIHMS787781-supplement-Suppl_Tables.pdf]

Supplementary Table 1 : Circulating miRNA profiling studies included in this analysis

\*min & max values; IFG= Impaired fasting glucose ; IGT= Impaired glucose tolerance

| Authors       | Years | Countries  | Patient studied                 | Ages              | Sex (M/F) | BMI Kg/m2_            | HbA1c %        | Fasting glucose g/L |
|---------------|-------|------------|---------------------------------|-------------------|-----------|-----------------------|----------------|---------------------|
| Prabu P.      | 2015  | INDIA      | T2DM vs control                 | 44.4±8.1          | 25/24     | 25.7±3.50             | 7.8±1.60       | 2.65±0.62           |
|               |       |            | Prediabetes vs controls         | 44.1±7.0          | 23/24     | 24.9±2.90             | 6.3±0.80       | 1.91±0.32           |
| Liu Y.        | 2014  | CHINA      | T2DM vs controls                | 50.2±6.7          | 78/82     | 23.32±0.31            | 9.16±1.64      | 2.04±0.48           |
|               |       |            | Prediabetes vs controls         | 47.9±7.8          | 82/75     | 23.10±0.26            | 6.25±0.67      | 0.93±0.11           |
| Parrizas M.   | 2014  | SPAIN      | T2DM vs controls                | 55.7±1.37         | NR        | 30.1±0.7              | NR             | 1.23±0.43           |
|               |       |            | Prediabetes IFG vs controls     | 53.6±0.1          | NR        | 29.4±0.7 <sup>1</sup> | NR             | 1.09±0.13           |
|               |       |            | Prediabetes ITG vs controls     | 56.8±1.4          |           | 28.9±0.8 <sup>2</sup> |                | 0.90±0.18           |
| Zampetaki A.  | 2010  | UK         | Physical activity               | 53.8±3.4          | NR        | 27.3±1.3              | NR             | 1.01±0.73           |
|               |       |            | T2DM vs control                 | 66.3±8.9          | 30/50     | 28.0±4.4              | 6.5±1.4        | 1.39±0.50           |
| Zhang T.      | 2013  | CHINA      | T2DM vs control                 | 63±8.5            | 16/14     |                       |                | 1.96±0.53           |
|               |       |            | Prediabetes vs controls         | 62±8              | 9/21      | NR                    | NR             | 1.17±0.04           |
| Higuchi C     | 2015  | JAPAN      | T2DM vs control                 | 62.3±13.2         | 96/59     | 25.9±4.9              | 7.31±1.1       | NR                  |
| Karolina D.S. | 2011  | SINGAPOR E | T2DM vs control                 | 41.0±12.1         | 13/0      | 28.0±4.9              | NR             | 1.91±0.77           |
|               |       |            | Pre diabetes vs control         | 48.0±10.4         | 8/0       | 30.0±3.9              | NR             | 1.08±0.02           |
| Karolina D.S. | 2012  | SINGAPOR E | T2DM vs control                 | 34.2±8.4          | NR        | 26.5±5.9              | NR             | 1.64±0.43           |
|               |       |            | Obese vs control                | 41.4±9.2          | NR        | 34.5±4.9              | NR             | 0.92±0.18           |
| Ortega F.J.   | 2014  | SPAIN      | Obese T2DM vs obese             | 57.7±8            | 18/0      | 33.4±3.3              | 7.1±2.1        | 2.01±1.03           |
|               |       |            | Lean T2DM vs lean               | 54.0±10.0         | 30/0      | 26.4±2.4              | 7.7±1.5        | 2.12±0.61           |
|               |       |            | Metormine treatment             | 52.0±9.0          | 8/9       | 35.7±6.2              | 8.3±4.6        | 1.25±0.19           |
| Kong L.       | 2011  | CHINA      | T2DM vs control                 | 47.3±2.6          | 9/9       | 26.3±0.8              | NR             | 1.58±0.09           |
|               |       |            | Pre diabetes vs control         | 49.3±2.8          | 11/8      | 26.7±0.9              | NR             | 1.09±0.02           |
| Wang X.       | 2014  | SWEDEN     | T2DM vs control                 | 55.8±5.8          | NR        | NR                    | NR             | NR                  |
| Rong Y.       | 2013  | CHINA      | T2DM vs control                 | 48.5 (42.0-56.0)* | 42/48     | 24.6±3.7              | NR             | 1.34 (1.22-2.33)*   |
| Santovito D.  | 2014  | ITALY      | T2DM vs control                 | 57.2±9.6          | 12/6      | 31.6±5.1              | 9.6±1.5        | 1.46±0.30           |
| Pescador N.   | 2013  | SPAIN      | T2DM vs control                 | 42.9±12.3         | 7/6       | 22.7±2.4              | NR             | 1.26±0.23           |
|               |       |            | Obese vs control                | 41.7±11.2         | 3/17      | 42.7±4.8              | NR             | 0.93±0.063          |
| Heneghan H.M. | 2011  | IRELAND    | Obese vs control                | 42.0 (37.0-53.0)* | 6/13      | 45.8 (43.0-52.0)*     | 6.1 (5.4-6.4)* | 0.96 (0.85-1.14)*   |
| Ortega FJ     | 2013  | SPAIN      | Obese (BMI>40) vs control       | 42.0±10.0         | 12/0      | 45.5±8.9              | 5.6±1.1        | 1.27±0.54           |
|               |       |            | Bariatric surgery               | 44.0±14.0         | 6/13      | 42.9±5.9              | NR             | NR                  |
| Wang R        | 2015  | CHINA      | Obese vs control                | 24.0±2.6          | 62/61     | 37.7±4.4              | NR             | 0.95 ±0.16          |
| Prats-Puig A  | 2013  | SPAIN      | Obese vs control                | 9.2±1.4           | 18/22     | NR                    | NR             | NR                  |
| Murri M       | 2013  | SPAIN      | Obese vs control                | 30.0±7.0          | 6/6       | 40.0±6.5              | NR             | 0.97±0.85           |
| Wang YT       | 2013  | TAIWAN     | Pre-diabetes vs control         | 56.5±8.5          | 16/15     | 26.6±3.6              | NR             | 1.07±0.19           |
| Zhao C        | 2011  | CHINA      | Gestational diabetes vs control | 28.8±2.2          | 0/24      | 21.4±1.7              | NR             | 0.96±0.16           |
| Sawada S      | 2013  | JAPAN      | Physical activity               | 29.9±1.2          | 12/0      | 23.2±1.2              | NR             | NR                  |
| Mooren FC     | 2014  | GERMANY    | Physical activity               | NR                | 13/0      | NR                    | NR             | NR                  |
| Baggish AL    | 2014  | USA        | Physical activity               | 51.8±1.4          | 21/0      | NR                    | NR             | NR                  |
| Uhlemann M    | 2012  | GERMANY    | Physical activity               | 30.4±2.0          | 7/6       | 23.4±1.1              | NR             | NR                  |
| Baggish AL    | 2011  | USA        | Physical activity               | 19.1±0.6          | 11/0      | NR                    | NR             | NR                  |

**Supplementary Table 2: Methods used for total RNA extraction, and miRNA detection**

LT: LifeTechnologies; AB: Applied Biosystems

| Studies             | Samples           | RNA-Extraction technologies                       | Kits for reverse transcription                                                   | Technologies used for miRNA detection                        |
|---------------------|-------------------|---------------------------------------------------|----------------------------------------------------------------------------------|--------------------------------------------------------------|
| Zampetaki A.        | Plasma            | miR-Neasy-mini kit (Qiagen)                       | Megaplex Primer Pools                                                            | TaqMan miRNA assays (LT)                                     |
| Prabu P.            | Serum             | miR-Neasy-mini kit (Qiagen)                       | miRCURY LNA™ power Labeling Kit (Exiqon)                                         | miRCURY LNA™ PCR system (Exiqon)                             |
| Karolina D.S - 2011 | Whole blood       | RiboPure™-Blood kit (Ambion)                      | miRCURY LNA™ power Labeling Kit (Exiqon)<br>MultiScribe-based high capacity cDNA | miRCURY LNA™ Arrays<br>TaqMan miRNA assays (LT) (Validation) |
| Karolina D.S - 2012 | Whole blood       | RiboPure™-Blood kit (Ambion)                      | miRCURY LNA™ power Labeling Kit (Exiqon)<br>MultiScribe-based high capacity cDNA | miRCURY LNA™ Arrays<br>TaqMan miRNA assays (LT) (Validation) |
| Ortega F.J. - 2014  | Plasma            | miR-Vana™PARIS™ kit (LT)                          | Taqman MiRNA Reverse transcription kit (LT)                                      | TaqMan hydrolysis probe (LT)                                 |
| Ortega F.J. - 2013  | Plasma            | miR-Vana™PARIS™ kit (LT)                          | Taqman MiRNA Reverse transcription kit (LT)                                      | TaqMan hydrolysis probe (LT)                                 |
| Kong L.             | Serum             | miR-Vana™PARIS™ kit (LT)                          | Taqman MiRNA Reverse transcription kit (LT)                                      | TaqMan miRNA assays (LT)                                     |
| Pescador N.         | Serum             | miR-Neasy-mini kit (Qiagen)                       | miRCURY LNA™ power Labeling Kit (Exiqon)                                         | MicroRNA LNA™ PCR primer mix                                 |
| Wang X.             | Plasma            | miR-Neasy-mini kit (Qiagen)                       | Universal cDNA synthesis kit (Exiqon)                                            | MicroRNA LNA™ PCR primer mix                                 |
| Rong Y.             | Plasma            | miR-Vana™PARIS™ kit (LT)                          | Taqman MiRNA Reverse transcription kit (LT)                                      | TaqMan miRNA assays (LT)                                     |
| Santovito D.        | Plasma (exosomes) | miR-Neasy-mini kit (Qiagen)                       | Quantitative real-time PCR (Exiqon)                                              | Quantitative real-time PCR (Exiqon)                          |
| Heneghan H.M.       | Whole blood       | Phenol-chloroform                                 | MultiScribe-based high capacity cDNA                                             | TaqMan miRNA assays (LT)                                     |
| Liu Y.              | Serum             | ND                                                | Taqman MiRNA Reverse transcription kit (LT)                                      | TaqMan miRNA assays (LT)                                     |
| Parrizas M.         | Serum             | miR-Neasy-mini kit (Qiagen)                       | Quantitative real-time PCR (Exiqon)                                              | Quantitative real-time PCR (Exiqon)                          |
| Wang R.             | Serum             | miR-Neasy-mini kit (Qiagen)                       | miRCURY LNA Universal RT Kit (Exiqon)                                            | Quantitative real-time PCR (Exiqon)                          |
| Prats-Puig A.       | Plasma            | miR-Vana™PARIS™ kit (LT)                          | Taqman MiRNA Reverse transcription kit (LT)                                      | TaqMan hydrolysis probe ((LT)                                |
| Murri M.            | Whole blood       | miR-Neasy-mini kit (Qiagen)                       | StepOnePlus Real-Time PCR System                                                 | TaqMan miRNA assays (LT)                                     |
| Wang YT             | Serum             | MasterPure™ complete DNA and RNA purification kit | Taqman MiRNA Reverse transcription kit (LT)                                      | TaqMan miRNA assays (LT)                                     |
| Zhang T             | Plasma            | Phenol-chloroform                                 | RevertAid cDNA Synthetis Kit (Thermo)                                            | SYBR Premix DimerEraser kit (TAKAEA)                         |
| Zhao C              | Serum             | miR-Neasy-mini kit (Qiagen)                       | Megaplex Primer Pools                                                            | TaqMan miRNA assays (LT)                                     |
| Uhlemann M          | Plasma            | miR-Neasy-mini kit (Qiagen)                       | Taqman MiRNA Reverse transcription kit (LT)                                      | TaqMan miRNA assays (LT)                                     |
| Higuchi C           | Serum             | QiAamp Circulating Nucleic Acid kit (Qiagen)      | Taqman MiRNA Reverse transcription kit (AB)                                      | TaqMan miRNA assays (AB)                                     |
| Sawada S            | Serum             | miRVana PARIS kit (Ambion)                        | Taqman MiRNA Reverse transcription kit (AB)                                      | TaqMan miRNA assays (AB)                                     |
| Mooren FC           | Plasma            | miR-Neasy-mini kit (Qiagen)                       | Taqman MiRNA Reverse transcription kit (AB)                                      | TaqMan miRNA assays (AB)                                     |
| Baggish AL - 2014   | Plasma            | microRNA extraction kit (Benevbio)                | MicroRNA Assay kit                                                               | TaqMan miRNA assays (LT)                                     |
| Baggish AL - 2011   | Plasma            | microRNA extraction kit (Benevbio)                | MicroRNA Assay kit                                                               | TaqMan miRNA assays (LT)                                     |

### Supplementary Table 3: Circulating miRNAs quantification in obese subjects vs controls, revalidated by individual RT-PCR assays

(+)= increased miRNA concentration in the blood of obese patients compared with controls;  
 (-) = decreased miRNA concentration in the blood of obese patients compared with controls

| References    | Years | Countries | Number of obeses/controls | Samples | MicroRNAs                                                                                                                                                                      | Status |
|---------------|-------|-----------|---------------------------|---------|--------------------------------------------------------------------------------------------------------------------------------------------------------------------------------|--------|
| Heneghan H.M. | 2011  | IRELAND   | 30/20                     | Blood   | miR 17-5-p; miR 132                                                                                                                                                            | +      |
| Ortega F.J.   | 2013  | SPAIN     | 12/49                     | Plasma  | miR-222;miR-140-5p;miR-142-3p;miR-126<br>miR-423-5p;miR -520c-3p;miR-532-5p;miR-125b;miR-130b;miR-221;miR-15a;miR-21;miR-590-5p;miR-193a-5p;miR-122;miR-483-5p;miR-636;miR-625 | +<br>- |
| Prats-Puig A. | 2013  | SPAIN     | 40/85                     | Plasma  | miR-142-3p;miR-486-5p;miR-486-3p;miR-130b;miR-532-5p;miR-222;miR-140-5p;miR-122;miR-363;miR-16-1;miR-423-5p<br>miR-221;miR-28-3p;miR-125b;miR-328                              | +<br>- |
| Murri M.      | 2013  | SPAIN     | 12/12                     | Blood   | miR-21; miR-27b; miR-103                                                                                                                                                       | -      |
| Karolina D.S. | 2012  | AUSTRALIA | 32/29                     | Blood   | miR-17;miR-183;miR-197;miR-23a;miR-509-5p;miR-584;miR-652;miR-130a;miR-195;miR-92a;miR-150;miR-192a;miR-27a;miR-320a<br>miR-103                                                | +<br>- |
| Pescador N.   | 2013  | SPAIN     | 20/20                     | Plasma  | miR-15b<br>miR-138 ; miR-376a ; miR-503                                                                                                                                        | +<br>- |
| Wang R.       | 2015  | CHINA     | 123/107                   | Serum   | miR-122                                                                                                                                                                        | +      |

**Supplementary Table 4: Circulating miRNAs quantification in prediabetic subjects vs controls, revalidated by individual qRT-PCR assays**

(+) = increased miRNA concentration in the blood of prediabetic patients compared with controls;

(-) = decreased miRNA concentration in the blood of prediabetic patients compared with controls

| References           | Years | Countries | Number of prediabetics/controls | Samples | MicroRNAs                                                                 | Status |
|----------------------|-------|-----------|---------------------------------|---------|---------------------------------------------------------------------------|--------|
| <b>PrabuP.</b>       | 2015  | INDIA     | 47/49                           | Serum   | miR-128<br>miR-423-5p                                                     | +<br>- |
| <b>Parrizas M.</b>   | 2014  | SPAIN     | 24/12                           | Serum   | miR-192; miR-193b; miR-150                                                | +      |
| <b>Liu Y.</b>        | 2014  | CHINA     | 157/138                         | Serum   | miR-126                                                                   | -      |
| <b>Karolina D.S.</b> | 2011  | AUSTRALIA | 14/15                           | Blood   | miR-144; miR-192;miR-29a; miR-30d<br>miR-146a; miR-182; miR-150; miR-320a | +<br>- |
| <b>Wang Y.T.</b>     | 2013  | TAIWAN    | 31/71                           | Serum   | miR-221; miR-let7g                                                        | +      |
| <b>Zhang T.</b>      | 2013  | CHINA     | 30/30                           | Plasma  | miR-126                                                                   | -      |
| <b>Zhao C.</b>       | 2011  | CHINA     | 24/24                           | Serum   | miR-132; miR-29a; miR-222                                                 | -      |

**Supplementary Table 5: Circulating miRNAs quantification in T2DM subjects vs controls, revalidated by individual qRT-PCR assays**

(+) = increased miRNA concentration in the blood of diabetic patients compared with controls

(-) = decreased miRNA concentration in the blood of diabetic patients compared with controls

| References           | Years | Countries | Number of diabetics/controls | Samples  | MicroRNAs                                                                                                            | Status |
|----------------------|-------|-----------|------------------------------|----------|----------------------------------------------------------------------------------------------------------------------|--------|
| <b>Prabu P.</b>      | 2015  | INDIA     | 49/49                        | Serum    | miR-374a-5p ; miR-130b-3p                                                                                            | +      |
| <b>Higuchi C.</b>    | 2015  | JAPAN     | 121/83                       | Serum    | miR-101 ; miR-375 ; miR-802                                                                                          | +      |
| <b>Liu Y.</b>        | 2014  | CHINA     | 160/138                      | Serum    | miR-126                                                                                                              | -      |
| <b>Kong L.</b>       | 2011  | CHINA     | 18/19                        | Serum    | miR-9; miR-29a; miR-30d; miR-34a; miR124a; miR-146a; miR-375                                                         | +      |
| <b>Zhang T.</b>      | 2013  | CHINA     | 30/30                        | Plasma   | miR-126                                                                                                              | -      |
| <b>Parrizas M.</b>   | 2014  | SPAIN     | 10/17                        | Serum    | miR-191; miR-21; miR-139-5p                                                                                          | -      |
| <b>Zampetaki A.</b>  | 2010  | UK        | 80/80                        | Plasma   | miR-28-3p                                                                                                            | +      |
|                      |       |           |                              |          | miR-15a; miR-20b; miR-21; miR-24; miR-28-3p; miR-29b ; miR-126; miR-150; miR-191; miR-197; miR-223; miR-320; miR-486 | -      |
| <b>Karolina D.S.</b> | 2011  | AUSTRALIA | 14/15                        | Blood    | miR-29a; miR-144; miR-150; miR-192; miR-320a<br>miR-30d; miR-146a; miR-182                                           | +      |
| <b>Karolina D.S.</b> | 2012  | AUSTRALIA | 29/29                        | Blood    | miR-27a; miR-150; miR-192; miR-320a                                                                                  | +      |
|                      |       |           |                              |          | miR-17; miR-92a; miR-130a; miR-197; miR-509-5p; miR-652                                                              | -      |
| <b>Wang X.</b>       | 2014  | SWEDEN    | 33/119                       | Plasma   | miR-15a; miR-21; miR-24; miR-29b; miR-126; miR-150; miR-320a; miR-486-5p                                             | +      |
| <b>Pescador N.</b>   | 2013  | SPAIN     | 13/20                        | Serum    | miR-503                                                                                                              | -      |
| <b>Rong Y.</b>       | 2013  | CHINA     | 90/90                        | Plasma   | miR-146a                                                                                                             | +      |
| <b>Santovito D.</b>  | 2014  | Italie    | 18/12                        | Plasma   | miR-326                                                                                                              | +      |
|                      |       |           |                              | Exosomes | miR-let7a; miR-let7f                                                                                                 | -      |
| <b>Ortega F.J.</b>   | 2014  | SPAIN     | 18 (Obese)/10                | Plasma   | miR-140-5p; miR-142-3p; miR-222;<br>miR-125b; miR-135b; miR126                                                       | +      |
|                      |       |           | 30 (Non obese)/35            | Plasma   | miR-140-5p; miR-142-3p; miR-222;<br>miR-125b; miR-135b; miR-126; miR-423-5p; miR-192;<br>miR-195; miR-532-5p         | -      |

**Supplementary Table 6:** KEGG pathways significantly enriched in target genes of the 119 human blood miRNAs (Blondal et al. 2013. Methods)  
Analyses were performed with DIANA-miRPath (<http://diana.imis.athena-innovation.gr/DianaTools/>)

| KEGG PATHWAYS                                                         | adjusted p value | number of genes in the pathways | number of blood circulating miRNAs |
|-----------------------------------------------------------------------|------------------|---------------------------------|------------------------------------|
| Pathways in cancer (hsa05200)                                         | 3,63E-21         | 212                             | 77                                 |
| PI3K-Akt signaling pathway (hsa04151)                                 | 7,26E-20         | 212                             | 76                                 |
| MAPK signaling pathway (hsa04010)                                     | 4,02E-17         | 172                             | 77                                 |
| HTLV-I infection (hsa05166)                                           | 1,37E-14         | 144                             | 76                                 |
| Regulation of actin cytoskeleton (hsa04810)                           | 3,75E-14         | 135                             | 76                                 |
| Endocytosis (hsa04144)                                                | 4,73E-14         | 129                             | 73                                 |
| Focal adhesion (hsa04510)                                             | 2,89E-13         | 131                             | 76                                 |
| Protein processing in endoplasmic reticulum (hsa04141)                | 2,82E-12         | 104                             | 72                                 |
| Transcriptional misregulation in cancer (hsa05202)                    | 3,12E-12         | 104                             | 74                                 |
| Wnt signaling pathway (hsa04310)                                      | 5,43E-12         | 107                             | 77                                 |
| Chemokine signaling pathway (hsa04062)                                | 3,70E-11         | 106                             | 75                                 |
| Calcium signaling pathway (hsa04020)                                  | 6,70E-11         | 100                             | 73                                 |
| Hepatitis B (hsa05161)                                                | 8,71E-11         | 89                              | 75                                 |
| Axon guidance (hsa04360)                                              | 1,43E-10         | 88                              | 73                                 |
| Influenza A (hsa05164)                                                | 1,50E-10         | 97                              | 72                                 |
| RNA transport (hsa03013)                                              | 6,37E-10         | 91                              | 73                                 |
| Neurotrophin signaling pathway (hsa04722)                             | 1,77E-09         | 85                              | 77                                 |
| Dopaminergic synapse (hsa04728)                                       | 1,77E-09         | 84                              | 75                                 |
| Ubiquitin mediated proteolysis (hsa04120)                             | 1,77E-09         | 86                              | 74                                 |
| Measles (hsa05162)                                                    | 1,77E-09         | 82                              | 72                                 |
| Cell cycle (hsa04110)                                                 | 1,77E-09         | 75                              | 71                                 |
| Oocyte meiosis (hsa04114)                                             | 1,82E-09         | 72                              | 72                                 |
| Retrograde endocannabinoid signaling (hsa04723)                       | 1,82E-09         | 70                              | 71                                 |
| Glutamatergic synapse (hsa04724)                                      | 1,96E-09         | 73                              | 74                                 |
| Insulin signaling pathway (hsa04910)                                  | 3,57E-09         | 83                              | 75                                 |
| Jak-STAT signaling pathway (hsa04630)                                 | 3,57E-09         | 83                              | 73                                 |
| Cholinergic synapse (hsa04725)                                        | 3,57E-09         | 72                              | 71                                 |
| Vascular smooth muscle contraction (hsa04270)                         | 5,55E-09         | 71                              | 70                                 |
| Osteoclast differentiation (hsa04380)                                 | 1,96E-08         | 74                              | 69                                 |
| Hepatitis C (hsa05160)                                                | 1,96E-08         | 75                              | 66                                 |
| Serotonergic synapse (hsa04726)                                       | 3,09E-08         | 65                              | 66                                 |
| TGF-beta signaling pathway (hsa04350)                                 | 5,51E-08         | 61                              | 67                                 |
| Amoebiasis (hsa05146)                                                 | 6,05E-08         | 61                              | 67                                 |
| Toxoplasmosis (hsa05145)                                              | 8,49E-08         | 65                              | 70                                 |
| T cell receptor signaling pathway (hsa04660)                          | 9,07E-08         | 68                              | 72                                 |
| Glioma (hsa05214)                                                     | 9,07E-08         | 46                              | 68                                 |
| Phosphatidylinositol signaling system (hsa04070)                      | 1,13E-07         | 54                              | 63                                 |
| ErbB signaling pathway (hsa04012)                                     | 2,26E-07         | 61                              | 71                                 |
| Melanogenesis (hsa04916)                                              | 2,26E-07         | 62                              | 69                                 |
| HIF-1 signaling pathway (hsa04066)                                    | 2,76E-07         | 63                              | 70                                 |
| Prostate cancer (hsa05215)                                            | 2,76E-07         | 62                              | 69                                 |
| Chagas disease (American trypanosomiasis) (hsa05142)                  | 4,44E-07         | 58                              | 69                                 |
| Tight junction (hsa04530)                                             | 5,17E-07         | 73                              | 74                                 |
| GnRH signaling pathway (hsa04912)                                     | 5,45E-07         | 60                              | 71                                 |
| Adherens junction (hsa04520)                                          | 6,70E-07         | 49                              | 72                                 |
| Small cell lung cancer (hsa05222)                                     | 6,70E-07         | 59                              | 72                                 |
| Toll-like receptor signaling pathway (hsa04620)                       | 7,44E-07         | 57                              | 63                                 |
| Gap junction (hsa04540)                                               | 7,78E-07         | 54                              | 71                                 |
| Fc gamma R-mediated phagocytosis (hsa04666)                           | 7,78E-07         | 58                              | 71                                 |
| Apoptosis (hsa04210)                                                  | 7,78E-07         | 55                              | 68                                 |
| miRNA surveillance pathway (hsa03015)                                 | 7,78E-07         | 55                              | 63                                 |
| Renal cell carcinoma (hsa05211)                                       | 8,49E-07         | 49                              | 70                                 |
| Arrhythmic right ventricular cardiomyopathy (ARVC) (hsa05412)         | 8,49E-07         | 49                              | 63                                 |
| Dilated cardiomyopathy (hsa05414)                                     | 1,07E-06         | 56                              | 67                                 |
| Pancreatic cancer (hsa04974)                                          | 1,20E-06         | 56                              | 61                                 |
| Pancreatic cancer (hsa05212)                                          | 1,33E-06         | 50                              | 71                                 |
| Pancreatic secretion (hsa04972)                                       | 1,92E-06         | 50                              | 68                                 |
| Salivary secretion (hsa04970)                                         | 2,43E-06         | 53                              | 70                                 |
| Lysine degradation (hsa00310)                                         | 2,72E-06         | 31                              | 67                                 |
| Long-term depression (hsa04730)                                       | 3,04E-06         | 41                              | 62                                 |
| Chronic myeloid leukemia (hsa05220)                                   | 3,39E-06         | 49                              | 72                                 |
| Hypertrophic cardiomyopathy (HCM) (hsa05410)                          | 4,31E-06         | 50                              | 63                                 |
| Bacterial invasion of epithelial cells (hsa05100)                     | 4,83E-06         | 44                              | 67                                 |
| Progesterone-mediated oocyte maturation (hsa04914)                    | 5,40E-06         | 50                              | 71                                 |
| Melanoma (hsa05218)                                                   | 6,88E-06         | 47                              | 69                                 |
| p53 signaling pathway (hsa04115)                                      | 7,59E-06         | 47                              | 71                                 |
| Gastric acid secretion (hsa04971)                                     | 7,59E-06         | 48                              | 67                                 |
| Colorectal cancer (hsa05210)                                          | 8,51E-06         | 44                              | 67                                 |
| mTOR signaling pathway (hsa04150)                                     | 1,07E-05         | 46                              | 70                                 |
| Long-term potentiation (hsa04720)                                     | 1,07E-05         | 47                              | 67                                 |
| B cell receptor signaling pathway (hsa04662)                          | 1,37E-05         | 45                              | 72                                 |
| Salmonella infection (hsa05132)                                       | 1,53E-05         | 45                              | 67                                 |
| Inositol phosphate metabolism (hsa00562)                              | 2,24E-05         | 38                              | 59                                 |
| Epstein-Barr virus infection (hsa05169)                               | 2,27E-05         | 106                             | 75                                 |
| Non-small cell lung cancer (hsa05223)                                 | 3,57E-05         | 36                              | 66                                 |
| Fc epsilon RI signaling pathway (hsa04664)                            | 3,57E-05         | 42                              | 64                                 |
| RNA degradation (hsa03018)                                            | 3,57E-05         | 42                              | 63                                 |
| Acute myeloid leukemia (hsa05221)                                     | 4,02E-05         | 39                              | 69                                 |
| Shigellosis (hsa05131)                                                | 5,80E-05         | 37                              | 68                                 |
| VEGF signaling pathway (hsa04370)                                     | 5,80E-05         | 40                              | 67                                 |
| Adipocytokine signaling pathway (hsa04920)                            | 8,50E-05         | 36                              | 64                                 |
| Endocrine and other factor-regulated calcium reabsorption (hsa04961)  | 0,000107931      | 32                              | 58                                 |
| Viral myocarditis (hsa05416)                                          | 0,000107931      | 37                              | 57                                 |
| Tuberculosis (hsa05152)                                               | 0,000110853      | 89                              | 73                                 |
| Endometrial cancer (hsa05213)                                         | 0,000120257      | 36                              | 70                                 |
| Nicotine addiction (hsa05033)                                         | 0,000127111      | 27                              | 59                                 |
| Basal cell carcinoma (hsa05217)                                       | 0,000153036      | 35                              | 61                                 |
| Sphingolipid metabolism (hsa00600)                                    | 0,000172706      | 28                              | 57                                 |
| Amyotrophic lateral sclerosis (ALS) (hsa05014)                        | 0,000217712      | 34                              | 63                                 |
| Epithelial cell signaling in Helicobacter pylori infection (hsa05120) | 0,000217712      | 34                              | 60                                 |
| Mineral absorption (hsa04978)                                         | 0,000217712      | 34                              | 56                                 |
| Type II diabetes mellitus (hsa04930)                                  | 0,000245918      | 32                              | 57                                 |
| Hedgehog signaling pathway (hsa04340)                                 | 0,000277848      | 33                              | 58                                 |
| N-Glycan biosynthesis (hsa00510)                                      | 0,00071666       | 31                              | 55                                 |
| Pathogenic Escherichia coli infection (hsa05130)                      | 0,001159342      | 28                              | 59                                 |
| ABC transporters (hsa02010)                                           | 0,001159342      | 28                              | 55                                 |
| Notch signaling pathway (hsa04330)                                    | 0,001159342      | 28                              | 53                                 |
| Aldosterone-regulated sodium reabsorption (hsa04960)                  | 0,001966793      | 26                              | 58                                 |
| Circadian rhythm (hsa04710)                                           | 0,002228412      | 23                              | 53                                 |
| Bladder cancer (hsa05219)                                             | 0,003310688      | 24                              | 52                                 |
| Basal transcription factors (hsa03022)                                | 0,004299452      | 23                              | 48                                 |
| Thyroid cancer (hsa05216)                                             | 0,004876742      | 19                              | 52                                 |
| Glycosaminoglycan biosynthesis - keratan sulfate (hsa00533)           | 0,005532818      | 11                              | 28                                 |
| GABAergic synapse (hsa04727)                                          | 0,01006108       | 55                              | 72                                 |
| Regulation of autophagy (hsa04140)                                    | 0,01838983       | 17                              | 44                                 |
| Maturity onset diabetes of the young (hsa04950)                       | 0,01838983       | 15                              | 39                                 |
| Dorso-ventral axis formation (hsa04320)                               | 0,02089946       | 17                              | 54                                 |
| Herpes simplex infection (hsa05168)                                   | 0,02206377       | 92                              | 73                                 |
| Butanoate metabolism (hsa00650)                                       | 0,02353886       | 16                              | 24                                 |
| Protein export (hsa03060)                                             | 0,03525717       | 15                              | 28                                 |
| Cytokine-cytokine receptor interaction (hsa04060)                     | 0,03868065       | 127                             | 71                                 |
| Collecting duct acid secretion (hsa04966)                             | 0,04563848       | 14                              | 24                                 |
